# Supplementary material for: Parallels between stream and coastal water quality associated with groundwater discharge
Source: PLoS One. 2019 Oct 28;14(10):e0224513. doi: 10.1371/journal.pone.0224513 (PMC6816572; doi:10.1371/journal.pone.0224513)
Supplement: S1 Table — Grab sample data are categorized by type (groundwater–gw, surface water–surf, and well) and location. Date collected and lat long indicate the sampling date and location of sampling. Rn concentrations (Bq/m3), temperature (°C), and salinity are given for each grab sample. Additionally, nutrient data (TN, TP, DIP, DSi, NOx, NH4+, DIN, and DON) are provided in μM. Radon survey data show location (lat long), date and time of measurement, water depth (m), salinity, and temperature (°C), and the radon concentration (Bq/m3). (XLSX) [file pone.0224513.s001.xlsx]

## Sheet: Grab
Name	Type	Location	Date_Coll	Lat	Long	Rn (Bq/m^3)	Temp (deg C)	Salinity	TN (µM)	TP (µM)	DIP (µM)	DSi (µM)	Nox (µM)	NH3 (µM)	DIN (µM)	DON (µM)
1	gw	Kahaluu Stream	2016-11-18	21.4447	-157.84	1467.97	24.03	0.24	94.4284	0.808929	0.422341	437.139	13.7288	32.317	46.0458	48.3826
2	gw	Kahaluu Stream	2016-11-18	21.4447	-157.84	507.917	22.5	0.24	1.33222	1.62488	1.25347	696.015	0.193078	1.03221	1.22528	0.106937
3	gw	Kahaluu Stream	2016-11-18	21.448	-157.837	2321.98	23.21	0.3	6.2	2.34116	2.11859	717.267	0.0818127	6.30376	6.38557	0
4	gw	Kahaluu Stream	2016-11-18	21.448	-157.837	2864.86	23.08	0.3	6.71522	2.27173	2.03712	723.696	0.0844307	6.52159	6.60602	0.1092
5	gw	Kahaluu Stream	2017-06-19	21.4446	-157.841	930.485	24.77	0.28	112.833	0.107827	0.0997422	263.031	83.5298	20.5387	104.069	0
6	gw	Kahaluu Stream	2017-06-19	21.449	-157.837	927.913	23	0.41	46.3478	1.01548	0.942093	652.753	2.1259	18.0362	20.1621	0
7	gw	Kahaluu Stream	2017-07-10	21.4434	-157.842	24.142	22.503	0.08	28.058	0.936278	1.09771	549.801	10.495	0.142789	10.6378	17.4202
8	gw	Kahaluu Stream	2017-07-10	21.4419	-157.843	1585.32	22.362	0.08	35.126	0.613424	0.516567	407.587	1.92765	34.9833	36.9109	0
9	gw	Kahaluu Stream	2017-07-10	21.4394	-157.844	171.379	22.17	0.08	3.28414	0.322855	0.774851	806.602	0.285578	0.571155	0.856733	2.42741
10	gw	Kahaluu Stream	2017-07-10	21.4385	-157.844	268.687	24.358	0.09	52.1179	0.548853	0.677995	443.369	12.494	3.56972	16.0637	36.0542
11	gw	Kahaluu Stream	2017-07-10	21.4385	-157.844	486.436	22.482	0.08		0.968564	1.22685	550.3	10.8519	0.571155	11.4231
12	gw	Kahaluu Stream	2016-10-24	21.449	-157.837	797.656	22.86	0.25	30.5925	1.4848	0.083893	814.323	0.14028	19.3722	19.5125	19.1694
13	gw	Kahaluu Stream	2016-10-24	21.4507	-157.836	448.6	22.31	0.3	35.337	0.968019	0.0427853	870.51	0.0316979	15.6379	15.6696	23.9139
14	surf	Kahaluu Stream	2016-09-30	21.4439	-157.841	44.61	22.3356	0.11	10.017	0.709892	0.174014	542.957	3.66414	0.249758	3.9139	6.10309
15	surf	Kahaluu Stream	2016-09-30	21.4503	-157.837	303.69	23.49	0.14	9.66411	0.673296	0.302432	546.592	4.98331	0	4.98331	4.6808
16	surf	Kahaluu Stream	2016-09-30	21.45	-157.836	330.85	23.5478	0.14	30.5925	1.4848	0.083893	814.323	10.4077	19.3722	29.7799	0.812607
17	surf	Kahaluu Stream	2016-09-30	21.4528	-157.835	317.97	26.0056	0.15	10.2612	0.616826	0.372701	511.314	4.79312	0	4.79312	5.46804
18	surf	Kahaluu Stream	2016-10-14	21.4371	-157.844	507.917	23.0994	0.11	34.4121	0.35514	0.419711	342.853	33.6268	0.356972	33.9837	0.428366
19	surf	Kahaluu Stream	2016-10-14	21.4386	-157.844	2321.98	20.8708	0.11	12.5654	1.00085	1.16228	500.965	11.4231	0.214183	11.6373	0.928127
20	surf	Kahaluu Stream	2016-10-14	21.4435	-157.842	1467.97	22.9581	0.12	12.4226	0.903993	1.06542	499.3	12.2084	0.214183	12.4226	0
21	surf	Kahaluu Stream	2017-07-10	21.4434	-157.842	70.2686	21.737	0.08	29.7001	1.00085	1.09771	548.054	11.7087	0.214183	11.9229	17.7772
22	surf	Kahaluu Stream	2017-07-10	21.4419	-157.843	74.3438	22.173	0.08	24.9166	0.839422	1.12999	550.8	10.0666	0.285578	10.3522	14.5645
23	surf	Kahaluu Stream	2017-07-10	21.4394	-157.844	1412.32	24.178	0.32
24	surf	Kahaluu Stream	2017-07-10	21.4392	-157.844	314.379	22.65	0.13	12.4764	0.927872	0.878571	570.006	10.4808	0.145436	10.6262	1.8502
25	surf	Kahaluu Stream	2017-07-10	21.4385	-157.844	262.491	24.868	0.09	50.1189	0.936278	0.774851	457.266	41.6229	2.42741	44.0503	6.06852
26	surf	Kahaluu Stream	2017-07-10	21.4385	-157.844	261.538	21.8	0.08		0.903993	1.09771	549.052	9.92382	0.64255	10.5664
27	gw	Kahaluu Stream	2017-03-15	21.4514	-157.835	1086.16	22.12	0.46	24.0342	0.73072	0.457585	589.713	0.486739	22.9741	23.4608	0.573323
28	gw	Kahaluu Stream	2017-04-19	21.4446	-157.841	1366.6	23.61	0.25	99.9749	0.463075	0.0803529	87.6018	69.024	14.1175	83.1414	16.8335
29	gw	Kahaluu Stream	2017-04-19	21.4473	-157.838	99.7149	24.34	0.26	113.821	0.721692	0.66231	738.571	74.0015	1.99391	75.9954	37.8252
30	surf	Kahaluu Stream	2017-01-23	21.4353	-157.852	24.729	20.342	0.09	17.563	1.42056	1.51742	579.188	11.6373	0.142789	11.7801	5.78295
31	surf	Kahaluu Stream	2017-02-15	21.4447	-157.841	144.478	24.19	0.26	16.0302	1.05807	0.842761	498.094	12.6111	0.241961	12.8531	3.17719
32	surf	Kahaluu Stream	2017-02-15	21.4526	-157.835	818	23.39	0.38	20.3356	0.909024	0.842389	435.658	12.3268	0.12851	12.4553	7.88027
33	surf	Kahaluu Stream	2017-03-15	21.4526	-157.835	26.0217	22.49	0.17	12.6597	0.49945	0.147617	447.787	8.67077	0.381916	9.05269	3.60706
34	gw	Ahuimanu Stream	2016-09-30	21.4419	-157.835	1617.93	23.8867	0.14	56.8067	0.654848	0.540821	542.811	30.1103	11.3658	41.4761	15.3306
35	gw	Ahuimanu Stream	2016-09-30	21.443	-157.835	650.899	24.2767	0.14	10.6792	1.69296	0.141163	727.247	0.228629	8.89906	9.12769	1.55152
36	gw	Ahuimanu Stream	2016-09-30	21.4459	-157.833		26.2578	0.15	11.5842	1.88919	0.197027	813.874	0.214466	8.11525	8.32972	3.25443
37	gw	Ahuimanu Stream	2016-11-18	21.4419	-157.835	196.062	24.403	0.22	101.781	0.922636	0.654368	549.907	75.0929	13.8522	88.9451	12.8364
38	gw	Ahuimanu Stream	2016-11-18	21.4413	-157.836	1671.99	23.95	0.23	100.158	1.23275	0.893348	559.049	71.1024	16.863	87.9654	12.1927
39	gw	Ahuimanu Stream	2017-07-28	21.4317	-157.838	105.56	21.2	0.25	5.22461	0.977421	0.874048	603.496	4.02832	0.381306	4.40962	0.814986
40	gw	Ahuimanu Stream	2016-10-24	21.4459	-157.833	1049.44	24.02	0.29	16.8248	1.31016	0.0854741	788.311	0.0236048	7.27799	7.3016	9.52325
41	gw	Ahuimanu Stream	2016-10-24	21.4454	-157.832	1824.92	23.59	0.34	35.9231	1.16938	0.0171369	836.052	0.122745	23.0556	23.1783	12.7448
42	surf	Ahuimanu Stream	2016-09-30	21.4469	-157.833	721.54	26.1833	0.08	19.6312	0.460076	0.104974	485.316	7.49688	0.267136	7.76402	11.8672
43	surf	Ahuimanu Stream	2016-09-30	21.4527	-157.835	751.1	28.3622	0.1	16.1465	0.414625	0.133082	500.291	4.81403	0.507997	5.32203	10.8244
44	surf	Ahuimanu Stream	2016-09-30	21.4393	-157.838	594.574	22.5856	0.14	10.9142	0.666081	0.344945	521.188	2.76513	0	2.76513	8.14908
45	surf	Ahuimanu Stream	2016-09-30	21.443	-157.835	1091.11	24.2767	0.14	18.335	0.3575	0.175244	490.748	6.63767	0.268111	6.90578	11.4292
46	surf	Ahuimanu Stream	2016-09-30	21.4459	-157.833	1057.04	26.2578	0.15	24.3801	0.409247	0.323161	486.307	9.40483	0	9.40483	14.9752
47	surf	Ahuimanu Stream	2016-09-30	21.4535	-157.836	592.77	27.7211	0.15	13.2699	0.468668	0.327026	510.825	3.66953	0.738626	4.40816	8.86174
48	surf	Ahuimanu Stream	2016-10-14	21.4396	-157.837	25.3987	25.0412	0.13	16.4921	0.484282	0.677995	479.328	7.35362	0.142789	7.49641	8.99569
49	surf	Ahuimanu Stream	2016-10-14	21.4462	-157.833	75.4472	26.0455	0.15	17.8486	0.387425	0.451996	434.391	13.0652	0.214183	13.2794	4.56924
50	surf	Ahuimanu Stream	2016-10-14	21.4453	-157.832	0	27.5043	0.17	7.06805	0.322855	0.35514	427.734	0.356972	0.285578	0.64255	6.4255
51	surf	Ahuimanu Stream	2017-07-28	21.4317	-157.838	22.752	20.73	0.24	5.90508	1.10089	0.91186	602.813	4.6676	0.123382	4.79098	1.1141
52	surf	Ahuimanu Stream	2016-10-07	21.4481	-157.834	128.066	29.8674	0.16	18.277	0.451996	0.613424	412.422	6.78247	0.999522	7.78199	10.495
53	gw	Ahuimanu Stream	2017-03-15	21.4471	-157.834	149.282	24.19	0.26	10.5934	0.612037	0.349526	498.294	2.68586	0.913427	3.59928	6.99411
54	gw	Ahuimanu Stream	2017-03-15	21.4446	-157.833	854.801	23.86	0.29	16.6581	0.353941	0.163701	605.111	9.07061	5.39255	14.4632	2.1949
55	gw	Ahuimanu Stream	2017-03-15	21.4455	-157.832	376.192	24.57	0.3	116.155	3.54882	2.59083	832.743	41.3052	0.218668	41.5239	74.6315
56	gw	Ahuimanu Stream	2017-03-15	21.4455	-157.832	491.092	24.68	0.36	63.5251	1.40701	0.800215	596.073	39.7124	1.24006	40.9525	22.5726
57	gw	Ahuimanu Stream	2017-03-15	21.4468	-157.833	462.386	23.39	0.38	11.3049	1.13233	0.421718	603.158	0.0313616	6.47377	6.50513	4.7998
58	gw	Ahuimanu Stream	2017-03-15	21.4455	-157.832	357.769	24.08	0.38	13.7616	1.15802	0.587014	632.693	0.251569	9.14725	9.39882	4.36281
59	gw	Ahuimanu Stream	2017-04-19	21.4431	-157.835	1608	24.34	0.18	11.3787	0.44986	0.356804	230.899	1.01744	7.6173	8.63474	2.74399
60	gw	Ahuimanu Stream	2017-04-19	21.4418	-157.835	669.262	24.23	0.2	127.722	0.320051	0.220841	183.206	105.374	9.46848	114.843	12.8787
61	surf	Ahuimanu Stream	2017-02-15	21.4466	-157.833	130.458	22.49	0.17	21.2953	0.689907	0.536971	458.315	14.9146	0.18721	15.1018	6.19352
62	surf	Ahuimanu Stream	2017-02-15	21.448	-157.835	792.598	23.86	0.29	21.267	1.56359	1.54663	240.193	7.34352	0.121884	7.46541	13.8016
63	surf	Ahuimanu Stream	2017-02-15	21.4392	-157.838	125.61	22.12	0.46	11.4904	0.698447	0.602484	476.125	5.26774	0.444498	5.71224	5.77821
64	gw	Kahaluu Lagoon	2017-05-26	21.4571	-157.839	274.467	25.4	24.07	17.6216	0.988468	0.906944	151.564	2.39817	2.40048	4.79864	12.8229
65	gw	Kahaluu Lagoon	2017-05-26	21.4571	-157.839	889.95	25.06	26.93	22.1213	0.541043	0.445719	219.411	1.04835	20.1959	21.2443	0.87704
66	gw	Kahaluu Lagoon	2017-05-26	21.4571	-157.839	1308.34	25.84	19.41	9.33127	0.723928	0.370887	428.558	0.695525	5.5354	6.23093	3.10034
67	surf	Kahaluu lagoon	2016-10-07	21.4562	-157.839	26.6822	24.7707	1.33	15.7782	0.807136	0.548853	432.893	4.71203	0.142789	4.85482	10.9233
68	surf	Kahaluu lagoon	2016-10-07	21.4553	-157.838	0	24.9763	2.01	15.7068	0.774851	0.936278	451.617	6.56829	2.14183	8.71012	6.99665
69	surf	Kahaluu lagoon	2016-10-07	21.457	-157.839	0	23.9333	2.1	12.851	0.774851	0.774851	429.398	11.7087	2.21323	13.9219	0
70	surf	Kahaluu lagoon	2016-10-07	21.4545	-157.836	51.4032	29.3194	2.22	16.8491	1.29142	0.742565	426.902	5.42597	0.713944	6.13992	10.7092
71	surf	Kahaluu lagoon	2016-10-07	21.4577	-157.84	27.0253	25.4707	2.62	15.7782	0.742565	0.645709	412.089	5.64016	2.35602	7.99617	7.78199
72	surf	Kahaluu lagoon	2016-10-07	21.459	-157.84	23.9128	24.2459	3.93	18.277	0.774851	0.807136	402.769	15.4212	2.5702	17.9914	0.285578
73	surf	Kahaluu lagoon	2016-10-07	21.4601	-157.84	27.2877	24.2634	4.93	14.9928	0.839422	0.742565	375.224	7.13944	2.28462	9.42406	5.56876
74	surf	Kahaluu Beach	2017-02-03	21.4552	-157.837	112.57	22.77	15	10.2331	0.558002	0.389683	28.7974	0.203893	4.94678	5.15067	5.08244
75	surf	Kahaluu Beach	2017-02-03	21.4601	-157.84	72.02	23.32	17.78	9.74357	0.656248	0.506262	251.346	4.20432	0.758411	4.96273	4.78085
76	surf	Kahaluu Beach	2017-02-03	21.457	-157.839	313.67	22.52	26.34	8.29343	0.655527	0.526861	70.5744	1.63258	0.929089	2.56167	5.73176
77	surf	Kahaluu Beach	2017-02-03	21.459	-157.84	178.69	23.52	28.28	10.6737	0.597645	0.48387	72.6054	2.24612	2.23333	4.47945	6.19424
78	surf	N Kaneohe	2016-10-28	21.4838	-157.842	19.7	21.8322	9.2	10.7859	0.547784	0.406828	117.706	1.39949	0.670493	2.06998	8.71593
79	surf	N Kaneohe	2016-10-28	21.477	-157.842	38.6	23.4111	23.6	32.3481	1.27509	0.658826	331.509	22.3396	1.15757	23.4971	8.85101
80	surf	N Kaneohe	2016-10-28	21.4701	-157.844	96	23.5333	28	15.84	0.847826	0.716707	217.585	7.4817	1.71043	9.19213	6.64788
81	surf	N Kaneohe	2016-10-28	21.4673	-157.842	171	23.4544	23.8	17.4985	0.933533	0.599762	325.351	10.3997	0.130952	10.5306	6.96784
82	surf	N Kaneohe	2016-10-28	21.4651	-157.843	209	23.9911	10	8.59182	0.828405	0.475125	320.048	3.14345	1.43197	4.57543	4.0164
83	surf	N Kaneohe	2016-10-28	21.4615	-157.841	94.9	24.5511	11	7.05491	0.404207	0.346344	108.685	0.471012	0.787431	1.25844	5.79647
84	surf	Kahaluu Beach	2017-03-27	21.4606	-157.841	700.837	23.87	1.58	29.4039	1.11283	0.789599	384.34	7.24963	13.5699	20.8195	8.58444
85	surf	Kahaluu Beach	2017-03-28	21.4535	-157.826	90.484	25.35	32.05	29.3315	1.37075	0.957159	76.66	6.31054	16.3002	22.6108	6.72075
86	surf	Kahaluu Beach	2017-03-28	21.4592	-157.832	23.2867	23.53	32.64	6.84166	0.761917	0.4341	22.619	1.33235	0.632814	1.96516	4.87649
87	surf	Kahaluu Beach	2017-03-28	21.454	-157.826	675.767	23.28	2.38	181.726	3.20167	2.73079	945.058	129.846	4.17199	134.018	47.7073
88	surf	Kahaluu Beach	2017-03-28	21.4531	-157.825	156.371	25.52	20.3	57.4743	2.1166	1.55011	284.629	0.470367	47.6622	48.1326	9.34165
89	surf	Heeia Beach	2017-03-29	21.4401	-157.809	43.2539	24.65	16.24	6.42521	0.392169	0.310651	211.322	0.0791835	1.82402	1.9032	4.52201
90	surf	Heeia Beach	2017-03-29	21.44	-157.809	0	23.05	21.2	9.00808	0.582371	0.302885	111.845	0.128708	2.74258	2.87129	6.13679
91	surf	Heeia Beach	2017-03-29	21.4405	-157.809	64.9971	28.75	22.72	6.09839	0.434846	0.235103	72.9494	0.17071	1.40499	1.5757	4.52269
92	surf	Heeia Beach	2017-03-29	21.4404	-157.809	43.6541	26.53	27.42	31.0408	0.349492	0.206275	87.6998	0.034047	24.169	24.203	6.83773
93	surf	Kahaluu Beach	2017-03-28	21.4534	-157.825	247.554	25.02	1.68	81.6897	2.61876	2.14554	1076.64	46.6055	0.338746	46.9442	34.7454
94	surf	Kaneohe Bay	2017-07-14	21.413	-157.786	45.6658		18.59	11.4638	0.465041	0.337521	189.27	3.74846	2.44376	6.19222	5.27154
95	surf	Kaneohe Bay	2017-07-14	21.4128	-157.785	23.0111		15.46	10.6798	0.352141	0.269334	225.007	4.34689	2.96598	7.31287	3.3669
96	gw	Kahaluu Beach	2017-03-27	21.4601	-157.84	2089.96	25.45	8.35	39.3991	2.38336	1.48537	443.539	0.0791835	26.9395	27.0187	12.3804
97	gw	Kahaluu Beach	2017-03-27	21.461	-157.841	965.678	24.61	9.2	50.3023	0.906467	0.528038	401.116	0.0816911	34.1267	34.2084	16.0939
98	gw	Kahaluu Beach	2017-03-27	21.461	-157.841	1150.39	24.71	15.96	55.3277	1.20378	0.348176	308.614	0.0992442	47.4813	47.5806	7.74712
99	gw	Kahaluu Beach	2017-03-27	21.461	-157.841	2705.26	25.07	16.49	61.1063	1.27414	0.971511	430.367	0.176353	58.6632	58.8396	2.26672
100	gw	Kahaluu Beach	2017-03-27	21.4606	-157.841	2349.42	24.72	23.61	66.9106	0.988571	0.678327	336.009	0.111155	61.4164	61.5275	5.383
101	gw	Kahaluu Beach	2017-03-27	21.4606	-157.841	2486.61	25.08	24.69	166.799	0.418612	0.215967	231.101	0.139993	152.85	152.99	13.8091
102	gw	Kahaluu Beach	2017-03-28	21.4532	-157.825	737.174	24.77	32.15	9.72418	0.862371	0.589732	53.6594	0.988184	3.83706	4.82524	4.89894
103	gw	Kahaluu Beach	2017-03-28	21.4534	-157.825	3052.66	24.52	0.46	9.74048	4.33554	3.34861	721.796	0.437142	4.33431	4.77145	4.96903
104	gw	Kahaluu Beach	2017-03-28	21.454	-157.826	273.538	24.72	26.69	12.2989	1.90712	1.58677	125.214	1.77369	6.10099	7.87468	4.42422
105	gw	Heeia Beach	2017-03-29	21.44	-157.809	699.739	24.99	26.73	64.5553	3.74355	0.188071	160.836	0.0321663	63.7153	63.7475	0.807805
106	gw	Heeia Beach	2017-03-29	21.4401	-157.809	152.533	25.68	27.16	29.5035	0.369792	0.209195	71.623	0.0223737	29.1955	29.2178	0.285695
107	gw	Heeia Beach	2017-03-29	21.44	-157.809	394.106	24.9	27.43	77.0465	5.67449	0.184157	169.015	0.0215307	70.8623	70.8839	6.16262
108	surf	Kaneohe Bay	2017-07-14	21.4126	-157.784	113.948		15.08	14.3282	0.489448	0.430566	281.061	8.48493	2.1272	10.6121	3.71603
109	surf	Hoomaluhia Reservoir	2017-07-14	21.3884	-157.806	272.619		0.25	13.522	0.103218	0.0700394	412.208	4.51742	2.30127	6.81869	6.70327
110	surf	Hoomaluhia Reservoir	2017-07-14	21.3906	-157.805	45.2459		0.52	43.1251	0.271207	0.173095	412.583	6.28943	10.2348	16.5243	26.6008
111	surf	Kapunahala Stream	2017-07-18	21.4105	-157.803	113.191	29.7	0.28	6.51053	0.663862	0.636215	576.516	1.02454	0.784489	1.80903	4.70151
112	surf	Kapunahala Stream	2017-07-18	21.404	-157.807	133.242	26.8	0.25	9.71731	0.487901	0.437616	566.3	2.5499	0.363237	2.91314	6.80417
113	surf	Kapunahala Stream	2017-07-18	21.4045	-157.806	0	26.68	0.24	10.2513	0.96631	0.872411	570.29	7.44925	0.106376	7.55563	2.6957
114	surf	Kamooalii Stream	2017-07-18	21.3993	-157.803	68.5884	29.75	0.25	54.9081	0.367093	0.359501	492.878	32.2819	0.90353	33.1854	21.7227
115	surf	Kamooalii Stream	2017-07-18	21.4074	-157.802	45.4012	30.1	0.24	58.6105	0.401485	0.383569	499.154	33.8536	3.67656	37.5302	21.0804
116	surf	Kaneohe Stream	2017-07-19	21.4118	-157.791	369.621	23.4	0.27	27.9266	0.445824	0.213454	524.096	18.3694	0.106376	18.4758	9.45078
117	surf	Kaneohe Stream	2017-07-19	21.4112	-157.79	307.453	23.22	0.95	30.2752	0.638063	0.537948	446.536	18.2984	10.7624	29.0607	1.21441
118	surf	Kaneohe Stream	2017-07-19	21.4108	-157.789	309.138	23.48	1.07	29.0285	0.702764	0.6088	517.845	22.7282	1.04525	23.7734	5.25509
119	surf	Kaneohe Stream	2017-07-19	21.4112	-157.786	315.115	24.28	7.2	70.3485	2.84065	2.01067	221.211	0.446057	55.1832	55.6292	14.7192
120	surf	Kaneohe Stream	2017-07-19	21.411	-157.785	223.412	25.48	15.09	25.82	0.423268	0.409204	324.857	14.1773	7.91034	22.0877	3.73227
121	surf	Kapunahala Stream	2017-08-02	21.403	-157.806	24.5153	20.63	0.23	10.7005	1.21461	0.891922	538.624	6.01117	0.118422	6.12959	4.57092
122	surf	Kapunahala Stream	2017-08-02	21.4108	-157.801	136.578	23.35	0.2	11.0015	0.553788	0.513452	395.694	2.07977	3.10757	5.18735	5.8141
123	surf	Kapunahala Stream	2017-08-02	21.41	-157.805	166.318	23.42	0.19	11.5899	1.0999	0.540155	350.259	3.77549	0.362883	4.13838	7.45156
124	surf	Piho Stream	2017-08-25	21.384	-157.807	21.1274		0.0761856	9.74087	0.553447	0.58242	518.073	1.05295	0.0862857	1.13924	8.60163
125	surf	Kaneohe Stream	2017-08-25	21.4119	-157.799	2449.76		0.15018	129.413	2.3564	2.0504	961.427	102.596	1.53465	104.131	25.2823
126	surf	Kaneohe Stream	2017-08-25	21.4119	-157.799	497.072		0.129198	85.9947	1.29781	1.28234	873.755	64.5893	0	64.5893	21.4054
127	gw	Kaneohe Stream	2017-07-19	21.4118	-157.791	1182.94	23.46	0.62	11.2113	0.711294	0.648391	575.199	4.26248	0.106376	4.36886	6.84245
128	gw	Kaneohe Stream	2017-07-19	21.4112	-157.79	872.466	25.7	28.07	16.948	0.611617	0.598546	189.881	9.08959	5.95111	15.0407	1.90726
129	gw	Kaneohe Stream	2017-07-19	21.4108	-157.789	840.164	26.18	26.49	63.3756	1.08599	0.589289	278.552	2.45961	47.7661	50.2257	13.1499
130	gw	Kapunahala Stream	2017-07-28	21.404	-157.808	2884.81	26.78	0.36	43.2089	1.92704	1.65669	427.534	0.377434	37.477	37.8544	5.35447
131	gw	Kapunahala Stream	2017-08-02	21.403	-157.806	514.979	21.26	0.28	19.8636	2.77758	2.31622	586.706	0.839136	15.9956	16.8347	3.02888
132	gw	Kapunahala Stream	2017-08-02	21.406	-157.806	97.813	25.04	0.19	28.9821	0.614283	0.39895	151.579	7.94346	0.528691	8.47215	20.5099
133	gw	Kapunahala Stream	2017-08-02	21.4078	-157.805	2991.04	23.61	0.27	39.8414	0.372805	0.277043	369.957	0.686841	35.1689	35.8557	3.98565
134	gw	Kamooalii Stream	2017-08-02	21.4018	-157.803	140.669	25.86	0.19	24.8269	0.637754	0.330377	292.744	14.1081	0.655173	14.7633	10.0636
135	surf	Kaneohe Stream	2017-11-13	21.4117	-157.798	199.866	22.7791	0.223667	33.2024	0.618642	0.49382	443.31	20.5235	0.110773	20.6343	12.5681
136	surf	Kaneohe Stream	2017-11-13	21.4118	-157.799	3417.18	24.5019	0.228449	142.958	1.82177	1.65721	914.258	136.911	1.1052	138.016	4.94151
137	surf	Kapunahala Stream	2017-11-13	21.4039	-157.806	32.1815	22.2698	0.161105	15.8865	1.45909	1.12475	594.597	9.42396	0.131348	9.55531	6.33124
138	surf	Kapunahala Stream	2017-11-13	21.4053	-157.806	251.936	22.7863	0.0119278	8.1769	0.765221	0.66204	31.2117	0.663808	3.58483	4.24864	3.92826
139	surf	Kaneohe Stream	2017-11-13	21.4077	-157.805	1320.94	23.6785	0.158745	13.327	1.42434	0.480176	482.735	7.19538	0.474681	7.67006	5.65695
140	surf	Kaneohe Stream	2017-11-13	21.4108	-157.803	279.429	26.0777	0.162708	15.9228	1.0817	0.743827	482.218	6.63126	1.80815	8.43942	7.48334
141	surf	Kaneohe Stream	2017-11-17	21.4117	-157.791	379.251	22.3148	0.158221	23.1427	0.900486	0.642228	494.123	14.3084	0.0764828	14.3849	8.75786
142	surf	Kaneohe Stream	2017-11-17	21.4115	-157.79	364.774	22.5767	0.288683	54.4339	0.660497	0.489756	463.275	12.4086	41.4025	53.8111	0.622814
143	surf	Kaneohe Stream	2017-11-17	21.411	-157.788	254.714	23.531	6.25427	8.26569	0.955361	0.736606	540.194	2.9088	0.175925	3.08473	5.18097
144	surf	Kaneohe Stream	2017-11-17	21.411	-157.786	113.863	23.5843	9.43945	8.28811	0.666999	0.504488	28.4619	1.7264	2.74771	4.47411	3.814
145	surf	Kamooalii Stream	2017-11-17	21.4074	-157.802	86.3501	23.5481	0.706573	37.4017	0.558128	0.500714	426.963	26.8235	0.839446	27.663	9.73869
146	surf	Kuou Stream (Hoomaluhia)	2017-11-17	21.3897	-157.807	139.354	24.17	0.26161	13.4796	0.873051	0.61182	515.299	7.39662	0.220931	7.61756	5.86204
147	surf	Hoomaluhia Reservoir	2017-11-17	21.3897	-157.806	113.562	24.38	0.206635	28.1497	0.432528	0.227701	398.972	12.2253	7.62682	19.8521	8.29759
148	surf	Piho Stream (Hoomaluhia)	2017-11-17	21.3873	-157.804	319.576	25.073	0.204685	18.134	0.532156	0.343924	393.813	8.10161	3.43866	11.5403	6.59373
149	surf	Kapunahala Stream	2017-11-17	21.4041	-157.808	97.2064	23.2262	0.210537	8.40621	0.812856	0.735917	569.954	4.58659	0.270224	4.85681	3.5494
150	gw	Kaneohe Stream	2017-11-13	21.4117	-157.798	702.066	23.4256	0.400638	23.2074	1.91975	1.61991	422.815	15.6292	0.129633	15.7588	7.44856
151	gw	Kaneohe Stream	2017-11-13	21.4118	-157.799	1868.75	24.2041	0.23207	146.443	1.44585	1.23913	795.118	135.97	8.32634	144.296	2.147
152	gw	Kapunahala Stream	2017-11-13	21.4053	-157.806	1536.6	25.0193	0.222802	34.4145	1.52747	0.823873	474.392	1.0372	31.799	32.8362	1.57829
153	gw	Kaneohe Stream	2017-11-13	21.4077	-157.805	3468.66	25.2796	0.163831	32.9059	0.260994	0.199544	372.825	1.54434	30.1021	31.6464	1.25945
154	gw	Kaneohe Stream	2017-11-17	21.4117	-157.791	1882.52	23.0031	0.408327	17.134	0.915482	0.700648	498.365	11.9306	0.378668	12.3092	4.82474
155	gw	Kaneohe Stream	2017-11-17	21.4115	-157.79	2703.52	24.5827	13.6593	75.9033	0.935055	0.74448	534.759	0.177098	68.0132	68.1903	7.71303
156	gw	Kaneohe Stream	2017-11-17	21.411	-157.788	398.748	23.2711	0.0979838	28.3153	1.0768	0.81081	91.8606	0.117652	30.3284	30.4461	0
157	gw	Kaneohe Beach	2017-11-17	21.4128	-157.785	426.041	25.2306	31.4786	23.0358	1.29842	1.16772	130.652	19.9669	0.479396	20.4463	2.58958
158	surf	Ahuimanu Stream	2018-02-28	21.4291	-157.842	22.5806		0.24	12.873	1.42983	1.18986	599.574	11.2827	0.0700165	11.3527	1.52036
159	surf	Ahuimanu Stream	2018-02-28	21.4298	-157.841	23.2388		0.24	9.86232	1.11987	1.01988	570.851	8.67204	0.0600141	8.73206	1.13027
160	surf	Ahuimanu Stream	2018-02-28	21.4307	-157.839	91.953		0.24	6.73159	0.979883	0.779907	568.518	5.0912	0.0500118	5.14121	1.59037
161	gw	Kahaluu Beach	2017-06-14	21.4601	-157.84	1516.49	27.09	12.68	20.5904	7.32851	2.23002	578.39	0.110002	14.9803	15.0903	5.50012
162	gw	Kahaluu Beach	2017-06-14	21.4601	-157.84	2006.28	27.09	7.02	15.7203	3.03689	2.91003	658.092	0.0500011	8.06017	8.11017	7.61016
163	gw	Kahaluu Beach	2017-06-14	21.4601	-157.84	1823.84	27.6	3.24	17.0204	12.7513	10.3301	610.501	0.0100002	14.0503	14.0603	2.96006
164	gw	Kahaluu Beach	2017-06-23	21.4601	-157.84	706	28.33	24.75	37.7708	1.81547	1.21001	221.804	0.270006	33.6907	33.9607	3.81008
165	gw	Kahaluu Beach	2017-06-23	21.4601	-157.84	156.2	27.77	22.31	23.3105	0.924112	0.860008	265.325	0.100002	19.2604	19.3604	3.95008
166	gw	Kahaluu Beach	2017-06-14	21.4609	-157.84	1427.33	26.36	13.52	53.0311	1.12742	1.03001	591.431	0.0500011	30.9707	31.0207	22.0105
167	gw	Kahaluu Beach	2017-06-14	21.4609	-157.84	1428.61	26.21	14.31	59.2213	1.20781	1.14001	631.691	0.0400009	35.0208	35.0608	24.1605
168	gw	Kahaluu Beach	2017-06-14	21.4609	-157.84	1785.79	26.68	14.209	71.2515	0.800454	0.710007	602.351	0.0200004	65.0214	65.0414	6.21013
169	gw	Kahaluu Beach	2017-06-14	21.4609	-157.84	2619.86	26.36	12.55	46.631	2.21037	1.86002	587.52	0.0100002	37.7108	37.7208	8.91019
170	gw	Kahaluu Beach	2017-06-23	21.4603	-157.84	2033.7	24.16	15.29	71.3015	1.00407	0.890009	627.611	0.0400009	46.141	46.181	25.1205
171	gw	Kahaluu Beach	2017-06-23	21.4603	-157.84	942.6	26.64	23.29	19.3804	1.81179	1.68002	230.934	0.440009	11.9103	12.3503	7.03015
172	gw	Kahaluu Beach	2017-06-23	21.4611	-157.839	859.2	26.82	25.33	22.4405	0.771478	0.570006	218.224	0.0600013	19.2604	19.3204	3.12007
173	gw	Kahaluu Beach	2017-06-23	21.4611	-157.839	582.1	27.07	27.89	11.5902	1.41777	1.23001	178.623	0.210004	8.96019	9.1702	2.42005
174	well	Haiku tunnel	2013-02-06 09:25:00	21.4064	-157.831	571.249	18.52	0.06	12.35	1.08073	1.326	381.299	12.712	0	12.712	-0.362
175	well	Haiku Well	2013-02-06 10:05:00	21.4064	-157.831	1057.5	19.32	0.07	12.067	1.19273	1.538	535.997	11.62	0	11.62	0.447
176	well	Kapuna 1 springs	2013-02-06 11:03:00	21.4113	-157.822	9229.45	21	0.1	13.221	1.23473	1.432	549.371	12.579	0	12.579	0.642
177	well	Kapuna 2 springs	2013-02-06 11:50:00	21.4113	-157.822	5896.56	21.71	0.11	10.818	1.17273	1.365	680.906	10.107	0	10.107	0.711
178	well	Ioleka'a	2013-02-06 13:15:00	21.4153	-157.825	2551.91	21.79	0.09	9.095	2.40873	2.662	626.953	7.723	0	7.723	1.372
179	well	Kahalu'u Tunnel	2013-02-06 14:10:00	21.4355	-157.853	830.952	19.02	0.07	16.945	1.11073	1.466	486.792	12.933	0	12.933	4.012
180	well	Luluku Well	2013-02-06 14:50:00	21.3918	-157.817	4671.27	20.12	0.09	22.69	1.38473	1.527	554.421	17.343	0	17.343	5.347
181	well	Waihee Tunnel	2017-01-25	21.4464	-157.858	1451.08	19.82	0.07	17.277	1.324	1.453	543	14.065	0.143	14.208	3.212
182	well	Waihee Inclined Well	2017-01-25	21.4419	-157.868	903.484	19.33	0.04	16.064	1.291	1.388	458	8.567	0.143	8.71	7.497
183	well	Kahaluu	2017-01-23	21.4347	-157.856	362.901	19.336	0.06	17.4202	1.12999	1.19456	444.377	11.7087	0.214183	11.9229	5.49737

## Sheet: Rnsurvey
Lat	Long	Datetime	Depth (m)	Salinity	Temp (deg C)	Rn (Bq/m^3)
21.4849	157.847	2016-10-28 09:44:00	0.424111	15.871	22.4211	0
21.4846	157.846	2016-10-28 09:49:00	0.428333	15.1813	22.4433	19.7
21.4844	157.846	2016-10-28 09:54:00	0.432778	14.2209	22.4433	0
21.4845	-157.844	2016-10-28 09:59:00	0.451556	11.0372	21.24	79
21.4854	-157.843	2016-10-28 10:04:00	0.447444	7.88189	21.5522	19.7
21.484	-157.842	2016-10-28 10:09:00	0.438889	9.50762	22.4733	39.2
21.4838	-157.842	2016-10-28 10:14:00	0.446778	21.1827	23.1522	98.3
21.4821	-157.841	2016-10-28 10:19:00	0.459333	17.8008	23.3856	59
21.4803	-157.841	2016-10-28 10:24:00	0.457667	20.6273	23.3622	19.3
21.4784	-157.842	2016-10-28 10:29:00	0.451556	22.8757	23.4067	38.6
21.4775	-157.842	2016-10-28 10:34:00	0.454333	23.1239	23.48	38.5
21.4767	-157.842	2016-10-28 10:39:00	0.452222	22.6022	23.4956	38.4
21.4758	-157.842	2016-10-28 10:44:00	0.454889	23.7581	23.3078	115
21.4747	-157.843	2016-10-28 10:49:00	0.444111	22.4161	23.58	115
21.4733	-157.843	2016-10-28 10:54:00	0.455111	23.4889	23.4	173
21.4724	-157.843	2016-10-28 10:59:00	0.461889	19.8066	23.1711	115
21.4716	-157.844	2016-10-28 11:04:00	0.451111	18.2366	23.4433	96
21.4706	-157.844	2016-10-28 11:09:00	0.449333	17.672	23.5644	96.2
21.47	-157.844	2016-10-28 11:14:00	0.449667	17.7942	23.8311	76.7
21.4686	-157.843	2016-10-28 11:19:00	0.452444	20.99	23.3133	171
21.4683	-157.842	2016-10-28 11:24:00	0.436778	24.1005	23.3778	133
21.4673	-157.842	2016-10-28 11:29:00	0.443556	20.8801	23.8222	171
21.4666	-157.842	2016-10-28 11:34:00	0.443889	11.8811	23.9722	75.7
21.4651	-157.843	2016-10-28 11:39:00	0.460667	8.00956	24.0111	209
21.4645	-157.843	2016-10-28 11:44:00	0.446778	10.8009	23.8422	190
21.4632	-157.842	2016-10-28 11:49:00	0.463778	8.95241	24.4011	114
21.4619	-157.842	2016-10-28 11:54:00	0.451667	12.0194	24.8133	94.9
21.461	-157.841	2016-10-28 11:59:00	0.439778	15.1415	23.9111	114
21.4134	-157.785	2017-08-07 09:12:00	0.5	20.6539	25.88	18.5123
21.4142	-157.786	2017-08-07 09:17:00	1.0668	20.4276	25.613	18.5123
21.414	-157.786	2017-08-07 09:22:00	0.329184	20.8948	25.697	148.098
21.4138	-157.786	2017-08-07 09:27:00	0.5	18.0307	27.037	166.61
21.4137	-157.786	2017-08-07 09:32:00	0.5	17.3496	27.05	222.147
21.4143	-157.786	2017-08-07 09:37:00	0.5	22.6059	25.75	296.196
21.4145	-157.787	2017-08-07 09:42:00	0.573024	22.5029	25.907	222.147
21.4148	-157.787	2017-08-07 09:47:00	0.865632	22.1736	25.96	314.709
21.4149	-157.787	2017-08-07 09:52:00	0.719328	22.0253	26.06	333.221
21.4146	-157.787	2017-08-07 09:57:00	0.3048	19.6951	26.493	314.709
21.4145	-157.787	2017-08-07 10:02:00	0.5	19.7175	26.973	314.709
21.4145	-157.787	2017-08-07 10:07:00	0.5	19.8118	27.113	314.709
21.4145	-157.787	2017-08-07 10:12:00	0.5	20.1579	26.917	277.684
21.4145	-157.787	2017-08-07 10:18:00	0.5	20.2951	27.08	92.5613
21.4153	-157.787	2017-08-07 10:23:00	1.76784	25.2936	26.323	111.074
21.4157	-157.787	2017-08-07 10:28:00	1.64592	24.81	26.34	203.635
21.416	-157.787	2017-08-07 10:33:00	5.54736	25.0346	26.453	203.635
21.4169	-157.787	2017-08-07 10:38:00	4.45008	26.6318	26.463	185.123
21.4179	-157.788	2017-08-07 10:43:00	0.5	26.6526	26.43	74.0491
21.4184	-157.789	2017-08-07 10:48:00	2.75539	24.5104	26.243	111.074
21.4193	-157.789	2017-08-07 10:53:00	7.13232	24.7469	26.343	92.5613
21.4204	-157.789	2017-08-07 10:58:00	3.6576	26.7899	26.553	129.586
21.4214	-157.788	2017-08-07 11:03:00	1.12776	27.4717	27.153	92.5613
21.4224	-157.788	2017-08-07 11:08:00	0.5	33.8994	27.94	129.586
21.4235	-157.788	2017-08-07 11:13:00	4.02336	33.8994	27.857	74.0491
21.4244	-157.788	2017-08-07 11:18:00	1.03632	33.8994	28.153	111.074
21.4252	-157.789	2017-08-07 11:23:00	1.12166	33.8994	28.253	185.123
21.4254	-157.79	2017-08-07 11:28:00	3.9624	33.562	27.303	185.123
21.426	-157.791	2017-08-07 11:33:00	1.17653	33.8144	27.677	129.586
21.4269	-157.791	2017-08-07 11:38:00	1.3777	33.6457	27.583	111.074
21.4282	-157.791	2017-08-07 11:43:00	1.39598	33.6064	27.473	37.0245
21.4292	-157.793	2017-08-07 11:48:00	1.02413	33.8994	27.72	37.0245
21.4295	-157.794	2017-08-07 11:53:00	1.3655	33.8994	27.807	111.074
21.4295	-157.795	2017-08-07 11:58:00	1.6703	33.8994	27.897	111.074
21.4285	-157.796	2017-08-07 12:03:00	1.33502	33.8994	28.073	92.5613
21.4275	-157.796	2017-08-07 12:08:00	2.33477	33.8994	27.767	74.0491
21.4268	-157.795	2017-08-07 12:13:00	2.18237	33.8994	28.357	74.0491
21.426	-157.795	2017-08-07 12:18:00	1.96291	33.8994	28.68	37.0245
21.4257	-157.796	2017-08-07 12:23:00	1.14605	33.8994	28.443	74.0491
21.4258	-157.797	2017-08-07 12:28:00	1.5179	33.8994	28.383	148.098
21.4255	-157.798	2017-08-07 12:33:00	1.84709	33.8994	28.683	111.074
21.4252	-157.799	2017-08-07 12:38:00	1.95072	33.8994	28.9	148.098
21.4255	-157.8	2017-08-07 12:43:00	1.42646	33.8994	28.437	111.074
21.4266	-157.801	2017-08-07 12:48:00	1.11557	33.8994	28.637	240.66
21.4274	-157.803	2017-08-07 12:53:00	0.920496	33.8994	28.497	129.586
21.4286	-157.804	2017-08-07 12:58:00	1.63982	33.8994	28.8	92.5613
21.4299	-157.804	2017-08-07 13:03:00	1.24968	33.8994	28.503	203.635
21.4305	-157.805	2017-08-07 13:08:00	0.816864	33.8994	27.87	92.5613
21.4317	-157.805	2017-08-07 13:13:00	1.10338	33.8994	27.8	92.5613
21.4329	-157.805	2017-08-07 13:18:00	1.78003	33.8994	27.543	259.172
21.4341	-157.805	2017-08-07 13:23:00	1.46914	33.8994	27.453	74.0491
21.4355	-157.805	2017-08-07 13:28:00	1.43866	33.8994	27.883	55.5368
21.4367	-157.805	2017-08-07 13:33:00	1.70688	33.8994	28.09	129.586
21.4379	-157.806	2017-08-07 13:38:00	2.2921	33.8994	27.573	129.586
21.439	-157.807	2017-08-07 13:43:00	2.24333	33.8994	27.823	92.5613
21.44	-157.808	2017-08-07 13:48:00	1.30454	33.8994	28.593	55.5368
21.4404	-157.809	2017-08-07 13:53:00	0.890016	33.8994	29.223	74.0491
21.4434	-157.812	2017-08-18 09:04:00	0.1	33.3999	27.7472	0
21.4439	-157.812	2017-08-18 09:09:00	0.1	33.0394	27.3005	0
21.4446	-157.813	2017-08-18 09:14:00	1.0668	32.9119	27.0962	18.6445
21.4455	-157.813	2017-08-18 09:19:00	1.43256	32.8702	27.1132	18.6445
21.4463	-157.813	2017-08-18 09:24:00	1.524	32.7631	26.9388	18.6445
21.4474	-157.814	2017-08-18 09:29:00	1.03632	32.7505	27.1172	37.289
21.4484	-157.814	2017-08-18 09:34:00	1.2192	32.7823	27.4855	18.6445
21.4494	-157.814	2017-08-18 09:39:00	1.40208	32.7388	27.2941	0
21.4507	-157.814	2017-08-18 09:44:00	1.95072	32.7646	27.3822	18.6445
21.4519	-157.815	2017-08-18 09:49:00	2.31648	32.7491	27.2584	93.2225
21.4532	-157.815	2017-08-18 09:54:00	1.64592	32.7496	27.7503	37.289
21.4546	-157.816	2017-08-18 09:59:00	1.92024	32.7263	27.7489	37.289
21.4548	-157.817	2017-08-18 10:04:00	1.79832	32.732	27.8119	74.578
21.4542	-157.818	2017-08-18 10:09:00	1.09728	32.6695	27.5343	74.578
21.4535	-157.819	2017-08-18 10:14:00	1.15824	32.68	27.6291	37.289
21.4528	-157.82	2017-08-18 10:19:00	1.12776	32.6316	27.5245	130.512
21.4527	-157.822	2017-08-18 10:24:00	1.6764	32.6186	27.6001	0
21.4531	-157.823	2017-08-18 10:29:00	1.18872	32.6271	27.5473	55.9335
21.4538	-157.824	2017-08-18 10:34:00	4.8768	32.6814	27.857	55.9335
21.4534	-157.825	2017-08-18 10:39:00	0.73152	32.4972	28.0504	93.2225
21.4542	-157.826	2017-08-18 10:44:00	0.70104	32.1828	28.2405	93.2225
21.4552	-157.826	2017-08-18 10:49:00	1.18872	31.6324	28.3255	111.867
21.4564	-157.827	2017-08-18 10:54:00	1.8288	31.3954	27.7683	55.9335
21.4565	-157.828	2017-08-18 10:59:00	1.15824	31.9656	28.038	55.9335
21.457	-157.829	2017-08-18 11:04:00	1.18872	32.0551	28.1978	111.867
21.4581	-157.83	2017-08-18 11:09:00	1.24968	31.4403	27.934	74.578
21.4581	-157.831	2017-08-18 11:14:00	0.97536	30.0077	27.6993	37.289
21.4588	-157.832	2017-08-18 11:19:00	0.9144	28.8476	27.6659	55.9335
21.459	-157.832	2017-08-18 11:24:00	0.1	28.6717	28.3686	55.9335
21.4128	-157.785	2017-09-08 09:19:00	1.0668	17.3133	28.0261	127
21.4131	-157.785	2017-09-08 09:24:00	0.329184	21.4614	28.0475	174
21.4132	-157.784	2017-09-08 09:29:00	0.5	27.7786	27.8312	133
21.4136	-157.783	2017-09-08 09:34:00	0.5	30.1694	27.7373	203
21.4144	-157.782	2017-09-08 09:40:00	0.5	32.0545	28.1513	252
21.4151	-157.782	2017-09-08 09:45:00	0.573024	32.1071	28.4062	209
21.4156	-157.781	2017-09-08 09:50:00	0.865632	32.1473	28.3428	211
21.4163	-157.78	2017-09-08 09:55:00	0.719328	32.1853	28.3137	166
21.4166	-157.78	2017-09-08 10:00:00	0.3048	32.3026	28.3039	192
21.4169	-157.779	2017-09-08 10:05:00	0.5	32.3714	28.2785	72.7
21.4172	-157.778	2017-09-08 10:10:00	0.5	32.4243	28.303	122
21.4178	-157.777	2017-09-08 10:15:00	0.5	32.501	28.3355	74.2
21.4184	-157.777	2017-09-08 10:20:00	0.5	32.5418	28.3597	99.3
21.4187	-157.776	2017-09-08 10:25:00	1.76784	32.5798	28.3649	124
21.4191	-157.775	2017-09-08 10:30:00	1.64592	32.639	28.3888	0
21.4182	-157.775	2017-09-08 10:35:00	5.54736	32.6813	28.4052	50.3
21.418	-157.774	2017-09-08 10:40:00	4.45008	32.7446	28.4209	25.4
21.4179	-157.773	2017-09-08 10:45:00	0.5	32.8127	28.4378	50.8
21.4179	-157.772	2017-09-08 10:50:00	2.75539	32.8903	28.4943	25.4
21.4175	-157.772	2017-09-08 10:55:00	7.13232	32.9925	28.7094	51.1
21.417	-157.772	2017-09-08 11:00:00	3.6576	33.0545	28.7367	103
21.4169	-157.772	2017-09-08 11:05:00	1.12776	33.1205	28.7706	51.3
21.4153	-157.772	2017-09-08 11:10:00	0.5	33.1757	28.7769	0
21.4141	-157.772	2017-09-08 11:15:00	4.02336	33.3409	28.9631	0
21.4137	-157.772	2017-09-08 11:20:00	1.03632	33.5943	29.7137	26.1
21.413	-157.773	2017-09-08 11:25:00	1.12166	33.6212	29.7509	105
21.4133	-157.774	2017-09-08 11:30:00	3.9624	33.4724	29.0253	79.6
21.4131	-157.775	2017-09-08 11:35:00	1.17653	33.5613	28.8145	79.6
21.4125	-157.777	2017-09-08 11:40:00	1.3777	33.6407	28.7829	53.1
21.4122	-157.778	2017-09-08 11:45:00	1.39598	33.5841	28.6742	79.5
21.4122	-157.779	2017-09-08 11:50:00	1.02413	33.6886	28.9245	53.1
21.4121	-157.78	2017-09-08 11:55:00	1.3655	33.7842	29.257	161
21.4116	-157.781	2017-09-08 12:00:00	1.6703	33.9181	29.9621	26.9
21.4121	-157.783	2017-09-08 12:05:00	1.33502	32.665	29.7933	53.8
21.4123	-157.784	2017-09-08 12:10:00	2.33477	33.653	29.7315	27
21.4114	-157.785	2017-09-08 12:15:00	2.18237	17.8849	28.7966	53.5
21.411	-157.785	2017-09-08 12:20:00	1.96291	8.13417	28.3264	241
21.411	-157.786	2017-09-08 12:25:00	1.14605	1.14082	27.8341	375
21.411	-157.786	2017-09-08 12:30:00	1.5179	0.5	26.6534	1050
21.411	-157.787	2017-09-08 12:35:00	1.84709	0.2	26.2102	1630
21.411	-157.787	2017-09-08 12:40:00	1.95072	0.2	26.5758	1040
21.4108	-157.789	2017-09-08 12:45:00	1.42646	4.60458	28.3279	1420
21.4542	-157.826	2017-06-28 10:47:00	1.4	32.7803	29.563	0
21.4542	-157.826	2017-06-28 10:52:00	1.4	33.1109	28.61	182.29
21.4542	-157.826	2017-06-28 10:57:00	1.4	33.1294	28.593	547.027
21.4543	-157.825	2017-06-28 11:02:00	1.4	33.103	28.843	181.267
21.4542	-157.825	2017-06-28 11:07:00	1.4	33.1427	28.917	0
21.4552	-157.826	2017-06-28 11:12:00	1.4	33.1321	28.76	181.597
21.4566	-157.827	2017-06-28 11:17:00	1.4	33.0553	28.67	0
21.4568	-157.828	2017-06-28 11:22:00	1.4	33.0236	28.713	181.941
21.4577	-157.83	2017-06-28 11:27:00	1.4	32.9839	29.637	177.959
21.4583	-157.831	2017-06-28 11:32:00	1.4	33.0844	29.01	0
21.4591	-157.831	2017-06-28 11:37:00	1.4	33.103	29.577	178.072
21.4603	-157.832	2017-06-28 11:42:00	1.4	33.1215	29.11	540.213
21.4608	-157.832	2017-06-28 11:47:00	1.4	33.103	29.053	0
21.4618	-157.832	2017-06-28 11:52:00	1.4	33.0659	29.19	0
21.4624	-157.834	2017-06-28 11:57:00	1.4	30.3757	28.4	0
21.4616	-157.834	2017-06-28 12:02:00	1.4	30.0467	28.557	559.19
21.4613	-157.835	2017-06-28 12:07:00	1	29.648	29.817	181.267
21.4612	-157.837	2017-06-28 12:12:00	0.5	21.303	30.323	189.553
21.4609	-157.838	2017-06-28 12:17:00	0.5	20.0125	28.243	603.659
21.4608	-157.838	2017-06-28 12:22:00	0.5	13.5153	29.847	404.405
21.4452	-157.832	2017-04-19 08:44:00	0.01	0.05	28.0717	20.9
21.4457	-157.832	2017-04-19 08:49:00	0.01	0.0816667	27.0525	20.8
21.4458	-157.833	2017-04-19 08:54:00	0.01	0.161667	24.0033	21.2
21.4459	-157.833	2017-04-19 08:59:00	0.01	0.0875	23.7458	63
21.4459	-157.833	2017-04-19 09:04:00	0.01	0.1275	23.2275	62.4
21.4461	-157.833	2017-04-19 09:09:00	0.01	0.16	22.9058	0
21.4464	-157.833	2017-04-19 09:14:00	0.01	0.1625	22.7717	40.4
21.4471	-157.834	2017-04-19 09:19:00	0.01	0.169167	22.4583	40.2
21.4477	-157.834	2017-04-19 09:24:00	0.16	0.176667	22.3525	225
21.4482	-157.835	2017-04-19 09:29:00	0.16	0.183333	22.535	368
21.4489	-157.835	2017-04-19 09:34:00	0.16	0.19	22.5917	368
21.4492	-157.835	2017-04-19 09:39:00	0.16	0.19	22.6375	715
21.4501	-157.835	2017-04-19 09:44:00	0.16	0.19	22.7242	490
21.4512	-157.834	2017-04-19 09:49:00	0.16	0.191667	22.8117	797
21.4521	-157.835	2017-04-19 09:54:00	0.16	0.198333	22.8708	818
21.4529	-157.835	2017-04-19 09:59:00	0.15	0.2	22.9408	818
21.4529	-157.835	2017-04-19 10:04:00	0.15	0.19	22.5158	838
21.4517	-157.835	2017-04-19 10:09:00	0.15	0.175833	22.0125	897
21.4506	-157.836	2017-04-19 10:14:00	0.19	0.17	21.7642	669
21.4473	-157.838	2017-04-19 10:49:00	0.03	0.16	21.0675	211
21.4467	-157.839	2017-04-19 10:44:00	0.03	0.164167	21.2858	222
21.446	-157.839	2017-04-19 10:39:00	0.05	0.154167	20.9083	323
21.4453	-157.839	2017-04-19 10:34:00	0.03	0.15	20.6917	808
21.4446	-157.84	2017-04-19 10:29:00	0.03	0.15	20.9317	534
21.4492	-157.837	2017-04-19 10:24:00	0.03	0.168333	21.1208	646
21.4498	-157.836	2017-04-19 10:19:00	0.02	0.17	21.4192	669
21.4481	-157.837	2017-04-19 10:54:00	0.04	0.164167	21.0425	251
21.4446	-157.841	2017-04-19 10:59:00	0.04	0.15	21.1317	242
21.4446	-157.841	2017-04-19 11:04:00	0.05	0.158333	21.4233	384
21.4447	-157.841	2017-04-19 11:09:00	0.05	0.22	23.0167	211
21.4446	-157.841	2017-04-19 11:14:00	0.05	0.254167	23.6367	263
21.4451	-157.84	2017-04-19 11:19:00	0.02	0.26	23.665	202
21.4468	-157.839	2017-04-19 11:24:00	0.02	0.258333	23.7658	182
21.4472	-157.838	2017-04-19 11:29:00	0.03	0.2575	23.9158	142
21.4473	-157.838	2017-04-19 11:34:00	0.03	0.26	24.1567	81.1
21.4473	-157.838	2017-04-19 11:39:00	0.03	0.26	24.4625	102
21.4473	-157.838	2017-04-19 11:44:00	0.03	0.26	24.7483	102
21.4473	-157.838	2017-04-19 11:49:00	0.03	0.26	25.0258	123
21.4487	-157.837	2017-04-19 11:54:00	0.03	0.26	25.2775	61.2
21.4493	-157.837	2017-04-19 11:59:00	0.03	0.26	25.4358	164
21.4492	-157.837	2017-04-19 12:04:00	0.03	0.230833	25.6842	103
21.4497	-157.836	2017-04-19 12:09:00	0.03	0.158333	25.9008	82.1
21.4509	-157.836	2017-04-19 12:14:00	0.26	0.144167	25.9492	123
21.4523	-157.835	2017-04-19 12:19:00	0.03	0.124167	26.065	164
21.4519	-157.835	2017-04-19 12:24:00	0.03	0.121667	26.2917	0
21.4499	-157.835	2017-04-19 12:29:00	0.03	0.095	26.5917	20.5
21.4487	-157.835	2017-04-19 12:34:00	0.03	0.0358333	26.8775	0
21.4467	-157.833	2017-04-19 14:03:00	0.02	0.158333	26.445	143
21.4455	-157.833	2017-04-19 14:00:00	0.01	0.16	25.2675	204
21.4447	-157.833	2017-04-19 13:55:00	0.02	0.16	24.655	245
21.4441	-157.834	2017-04-19 13:50:00	0.03	0.16	24.6217	213
21.4441	-157.834	2017-04-19 13:45:00	0.03	0.16	24.6	102
21.4438	-157.834	2017-04-19 13:40:00	0.03	0.16	24.61	254
21.4438	-157.834	2017-04-19 13:35:00	0.03	0.16	24.5517	164
21.4431	-157.835	2017-04-19 13:29:00	0.03	0.16	24.635	246
21.4431	-157.835	2017-04-19 13:24:00	0.03	0.16	24.7158	246
21.4431	-157.835	2017-04-19 13:19:00	0.03	0.175	24.5158	143
21.4422	-157.835	2017-04-19 13:14:00	0.03	0.19	24.5217	226
21.4419	-157.835	2017-04-19 13:09:00	0.03	0.194167	24.4225	82.3
21.4419	-157.835	2017-04-19 13:04:00	0.05	0.13	24.2533	41.1
21.441	-157.836	2017-04-19 12:59:00	0.05	0.105	24.1758	29.7
21.441	-157.836	2017-04-19 12:54:00	0.05	0.119167	24.2258	0
21.44	-157.837	2017-04-19 12:49:00	0.05	0.126667	24.2792	0
21.4394	-157.837	2017-04-19 12:44:00	0.05	0.150833	24.165	20.5
21.4475	-157.834	2017-04-19 12:39:00	0.05	0.0333333	27.1033	0
21.4453	-157.832	2016-09-30 09:08:00	0.16	0.293889	26.0244	19.1
21.4456	-157.832	2016-09-30 09:13:00	0.16	0.284222	25.3644	39.1
21.4461	-157.833	2016-09-30 09:19:00	0.16	0.283444	25.3944	39.1
21.4465	-157.833	2016-09-30 09:24:00	0.16	0.295444	25.6378	58.7
21.4463	-157.833	2016-09-30 10:49:00		0.299778	25.1033	583
21.4459	-157.833	2016-09-30 10:44:00	0.19	0.289444	23.9978	641
21.445	-157.833	2016-09-30 10:39:00	0.16	0.291667	24.08	660
21.4443	-157.833	2016-09-30 10:34:00	0.16	0.287556	23.9244	543
21.4438	-157.834	2016-09-30 10:29:00	0.16	0.284667	23.8122	527
21.4437	-157.834	2016-09-30 10:24:00	0.16	0.281556	23.8356	607
21.4434	-157.835	2016-09-30 10:19:00	0.16	0.279222	23.81	451
21.4429	-157.835	2016-09-30 10:14:00	0.16	0.279111	23.7078	392
21.4422	-157.835	2016-09-30 10:09:00	0.16	0.279111	23.53	411
21.4416	-157.836	2016-09-30 10:04:00	0.16	0.281444	23.4578	392
21.4409	-157.836	2016-09-30 09:59:00	0.16	0.282222	23.2467	529
21.4407	-157.836	2016-09-30 09:54:00	0.16	0.28	23.19	411
21.4398	-157.837	2016-09-30 09:49:00	0.16	0.282556	23.2378	294
21.4392	-157.838	2016-09-30 09:44:00	0.16	0.283	23.3144	176
21.4393	-157.838	2016-09-30 09:39:00	0.16	0.283111	22.8322	196
21.4393	-157.838	2016-09-30 09:34:00	0.16	0.284	22.56	137
21.4465	-157.833	2016-09-30 09:29:00	0.16	0.175889	22.7089	117
21.4464	-157.833	2016-09-30 10:54:00	0.16	0.0405556	23.1733	718
21.4393	-157.838	2016-09-30 10:59:00	0.19	0.109889	23.32	746
21.4393	-157.838	2016-09-30 11:04:00	0.19	0.285444	22.5544	699
21.4393	-157.838	2016-09-30 11:09:00	0.19	0.286556	22.6567	698
21.4392	157.838	2016-09-30 11:14:00	0.19	0.286556	22.7411	796
21.4393	-157.838	2016-09-30 11:19:00	0.19	0.286667	22.99	699
21.44	-157.837	2016-09-30 11:24:00	0.19	0.289	23.5656	641
21.4412	-157.836	2016-09-30 11:29:00	0.19	0.288556	23.8711	680
21.4419	-157.835	2016-09-30 11:34:00	0.19	0.289	23.9722	796
21.4419	-157.835	2016-09-30 11:39:00	0.19	0.288778	23.8833	785
21.4419	-157.835	2016-09-30 11:44:00	0.19	0.286111	23.86	815
21.4425	-157.835	2016-09-30 11:49:00	0.19	0.282444	24.24	874
21.443	-157.835	2016-09-30 11:54:00	0.19	0.281	24.3389	427
21.443	-157.835	2016-09-30 11:59:00	0.19	0.282667	24.5322	427
21.443	-157.835	2016-09-30 12:04:00	0.19	0.283667	24.6078	629
21.443	-157.835	2016-09-30 12:09:00	0.19	0.283111	24.79	525
21.4432	-157.835	2016-09-30 12:14:00	0.19	0.289333	25.5644	582
21.4442	-157.833	2016-09-30 12:19:00	0.19	0.294889	26.0489	621
21.4453	-157.833	2016-09-30 12:24:00	0.19	0.295111	26.3289	785
21.4459	-157.833	2016-09-30 12:29:00	0.19	0.293889	26.6356	408
21.4459	-157.833	2016-09-30 12:34:00	0.19	0.293	26.0156	642
21.4459	-157.833	2016-09-30 12:39:00	0.19	0.292111	25.74	718
21.4459	-157.833	2016-09-30 12:44:00	0.19	0.294333	25.5844	602
21.4459	-157.833	2016-09-30 12:49:00	0.19	0.295667	25.4922	776
21.4464	-157.833	2016-09-30 12:54:00	0.19	0.267333	25.75	718
21.4469	-157.834	2016-09-30 12:59:00	0.19	0.0461111	26.4989	514
21.4469	-157.833	2016-09-30 13:04:00	0.16	0.268889	25.7056	679
21.4469	-157.833	2016-09-30 13:09:00	0.16	0.295556	25.4278	513
21.4469	-157.833	2016-09-30 13:14:00	0.16	0.295889	25.9911	563
21.447	-157.834	2016-09-30 13:19:00	0.16	0.314222	27.1011	688
21.4485	-157.835	2016-09-30 13:24:00	0.16	0.322111	27.3922	718
21.4499	-157.835	2016-09-30 13:29:00	0.16	0.326889	27.7867	669
21.4511	-157.834	2016-09-30 13:34:00	0.16	0.329889	27.9622	718
21.4526	-157.835	2016-09-30 13:39:00	0.16	0.236667	28.27	972
21.4527	-157.835	2016-09-30 13:44:00	0.16	0.0493333	29.5733	524
21.4527	-157.835	2016-09-30 13:49:00	0.16	0.0505556	30.9767	602
21.4527	-157.835	2016-09-30 13:54:00	0.16	0.0512222	32.1489	485
21.4527	-157.835	2016-09-30 13:59:00	0.16	0.148444	31.37	330
21.4527	-157.835	2016-09-30 14:04:00	0.16	0.325556	28.3011	455
21.4439	-157.841	2016-09-30 15:35:00	0.26	0.311333	27.5489	95
21.4447	-157.84	2016-09-30 15:30:00	0.02	0.310667	27.4678	133
21.4452	-157.839	2016-09-30 15:25:00	0.02	0.309333	27.1256	247
21.4461	-157.839	2016-09-30 15:20:00	0.02	0.315222	27.2633	171
21.4469	-157.838	2016-09-30 15:15:00	0.02	0.304778	26.3078	266
21.4475	-157.838	2016-09-30 15:10:00	0.02	0.281222	24.7567	311
21.4482	-157.837	2016-09-30 15:05:00	0.02	0.278	24.2878	389
21.449	-157.847	2016-09-30 15:00:00	0.02	0.276444	23.8478	272
21.4497	-157.834	2016-09-30 14:55:00	0.02	0.279444	23.46	331
21.4503	-157.837	2016-09-30 14:50:00	0.02	0.278778	23.5589	272
21.451	-157.836	2016-09-30 14:45:00	0.02	0.278778	23.55	369
21.4518	-157.835	2016-09-30 14:40:00	0.16	0.275778	23.4611	629
21.4529	-157.835	2016-09-30 14:35:00	0.16	0.273222	23.3511	486
21.4529	-157.835	2016-09-30 14:30:00	0.16	0.269333	23.1133	389
21.4529	-157.835	2016-09-30 14:24:00	0.02	0.270444	22.9422	414
21.4529	-157.835	2016-09-30 14:19:00	0.02	0.269	22.4978	428
21.4529	-157.835	2016-09-30 14:14:00	0.26	0.269778	22.2522	777
21.4535	-157.836	2016-09-30 14:09:00	0.26	0.194333	22.3011	658
21.41	-157.805	2017-08-25 09:02:00	0.07	0.566	26.793	186.445
21.4087	-157.805	2017-08-25 09:07:00	0.07	0.287333	23.8393	149.156
21.4071	-157.805	2017-08-25 09:12:00	0.06	0.233333	23.0955	167.8
21.4053	-157.806	2017-08-25 09:17:00	0.05	0.218667	22.8612	24.5153
21.4045	-157.806	2017-08-25 09:22:00	0.07	0.214	22.8333	279.668
21.4045	-157.806	2017-08-25 09:27:00	0.07	0.225333	23.0732	223.734
21.4045	-157.806	2017-08-25 09:32:00	0.07	0.228	23.2902	130.512
21.4038	-157.806	2017-08-25 09:37:00	0.07	0.220667	23.139	167.8
21.4039	-157.806	2017-08-25 09:42:00	0.07	0.212	22.695	205.089
21.4041	-157.806	2017-08-25 09:47:00	0.06	0.209333	22.421	186.445
21.4046	-157.806	2017-08-25 09:52:00	0.06	0.210667	22.534	354.245
21.4048	-157.806	2017-08-25 09:57:00	0.06	0.212	22.7638	205.089
21.4053	-157.806	2017-08-25 10:02:00	0.06	0.215333	23.5605	298.312
21.4059	-157.806	2017-08-25 10:07:00	0.06	0.215333	24.1212	130.512
21.4062	-157.805	2017-08-25 10:12:00	0.07	0.214	23.549	223.734
21.4067	-157.805	2017-08-25 10:17:00	0.07	0.212667	23.4055	167.8
21.4074	-157.805	2017-08-25 10:22:00	0.05	0.21	23.6678	24.5153
21.4081	-157.805	2017-08-25 10:27:00	0.07	0.210667	24.1422	279.668
21.4089	-157.805	2017-08-25 10:32:00	0.07	0.213333	24.735	223.734
21.4045	-157.806	2017-08-25 09:37:00	0.07	0.228	23.2902	130.512
21.4038	-157.806	2017-08-25 09:42:00	0.07	0.220667	23.139	167.8
21.4039	-157.806	2017-08-25 09:47:00	0.07	0.212	22.695	205.089
21.4041	-157.806	2017-08-25 09:52:00	0.06	0.209333	22.421	186.445
21.4046	-157.806	2017-08-25 09:57:00	0.06	0.210667	22.534	354.245
21.4048	-157.806	2017-08-25 10:02:00	0.06	0.212	22.7638	205.089
21.4053	-157.806	2017-08-25 10:07:00	0.06	0.215333	23.5605	298.312
21.4059	-157.806	2017-08-25 10:12:00	0.06	0.215333	24.1212	130.512
21.4062	-157.805	2017-08-25 10:17:00	0.07	0.214	23.549	223.734
21.4067	-157.805	2017-08-25 10:22:00	0.07	0.212667	23.4055	167.8
21.4074	-157.805	2017-08-25 10:27:00	0.07	0.21	23.6678	166.318
